# Supplementary material for: Multidisciplinary Group Education for Gestational Diabetes Mellitus: A Prospective Observational Cohort Study
Source: MDPI journal article supplement (doi:10.3390/jcm9020509), 2020-02-13
Supplement: s1 [file s1]

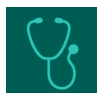

**Supplementary:** Overview of the general characteristics and comparisons between the individual and group education groups excluding non-Dutch-speaking women from the analyzes.

**Table S1.** Baseline characteristics.

|                                         | General Cohort<br><i>n</i> = 172 | Group Education<br><i>n</i> = 98 | Individual<br>Education<br><i>n</i> = 74 | <i>p</i> -Value |
|-----------------------------------------|----------------------------------|----------------------------------|------------------------------------------|-----------------|
| age (mean ± SD)                         | 32.3±5.1                         | 32.1±5.3                         | 32.6±4.9                                 | 0.522           |
| BMI at first prenatal visit (mean ± SD) | 26.8±5.4                         | 26.5±5.4                         | 27.1±5.4                                 | 0.968           |
| overweight at first prenatal visit %(n) | 30.1 (52)                        | 29.3 (29)                        | 31.1 (23)                                | 0.853           |
| obese at first prenatal visit %(n)      | 28.3 (49)                        | 27.3 (27)                        | 29.7 (22)                                | 0.853           |
| EM background %(n)                      | 16.3 (28)                        | 15.3 (15)                        | 17.6 (13)                                | 0.850           |
| primigravida %(n)                       | 40.2 (70)                        | 44.0 (44)                        | 35.1 (26)                                | 0.223           |
| first degree relative with T2DM %(n)    | 19.5 (34)                        | 17.0 (17)                        | 23.0 (17)                                | 0.577           |
| history of GDM ( <i>n</i> = 102) %(n)   | 10.8 (11)                        | 13.0 (7)                         | 8.3 (4)                                  | 0.823           |
| high secondary diploma %(n)             | 84.3 (145)                       | 84.8 (84)                        | 83.6 (61)                                | 0.253           |
| higher degree diploma %(n)              | 68.9 (115)                       | 69.8 (67)                        | 67.6 (48)                                | 0.866           |
| paid job %(n)                           | 84.7 (144)                       | 83.7 (82)                        | 86.1 (62)                                | 0.825           |
| single %(n)                             | 7.6 (13)                         | 7.1 (7)                          | 8.2 (6)                                  | 1.000           |
| week at OGTT (median (IQR))             | 26 (24-28)                       | 26 (25-27)                       | 26 (24-28)                               | 0.743           |
| HbA1c % at OGTT (mean ± SD)             | 5.2 ± 0.4                        | 5.2 0.4                          | 5.2 ± 0.4                                | 0.774           |
| insulin treatment %(n)                  | 15.3 (26)                        | 16.3 (16)                        | 13.9 (10)                                | 0.825           |
| present at postpartum OGTT %(n)         | 89.7 (56)                        | 88.0 (88)                        | 91/9 (68)                                | 0.246           |
| weeks after delivery (median (IQR))     | 14 (9-19)                        | 15 (12-18)                       | 14 (8-20)                                | 0.804           |
| abnormal postpartum OGTT %(n)           | 38.2 (58)                        | 35.6 (31)                        | 41.5 (27)                                | 0.567           |

GDM: gestational diabetes mellitus; BMI = body mass index; OGTT: oral glucose tolerance test; EM: ethnic minority; T2DM: type 2 diabetes mellitus; Statistically significant *p*-values are in bold.

**Table S2.** Pregnancy outcomes of women in group versus individual education.

|                                      | general cohort<br>n = 172 | group education<br>n = 98 | individual<br>education<br>n = 74 | p-value |
|--------------------------------------|---------------------------|---------------------------|-----------------------------------|---------|
| <b>Maternal Outcomes</b>             |                           |                           |                                   |         |
| total weeks of gestation (median)    | 39 (37-41)                | 39 (37-41)                | 39 (38-40)                        | 0.804   |
| gestational hypertension %(n)        | 14.5 (25)                 | 16.0 (16)                 | 12.3 (9)                          | 0.646   |
| preeclampsia %(n)                    | 9.2 (16)                  | 12.0 (12)                 | 5.5 (4)                           | 0.232   |
| preterm delivery %(n)                | 9.2 (16)                  | 12.0 (12)                 | 5.5 (4)                           | 0.232   |
| cesarean section %(n)                | 29.5 (51)                 | 31.0 (31)                 | 27.4 (20)                         | 0.730   |
| <b>Neonatal Outcomes</b>             |                           |                           |                                   |         |
| macrosomia %(n)                      | 5.2 (9)                   | 5.0 (5)                   | 5.6 (4)                           | 1.000   |
| LGA %(n)                             | 8.2 (14)                  | 6.1 (6)                   | 11.1 (8)                          | 0.364   |
| SGA %(n)                             | 10.0 (17)                 | 9.1 (9)                   | 11.3 (8)                          | 0.836   |
| shoulder dystocia %(n)               | 1.7 (3)                   | 2.0 (2)                   | 1.4 (1)                           | 1.000   |
| NICU transfer %(n)                   | 6.4 (11)                  | 7.0 (7)                   | 5.6 (4)                           | 1.000   |
| Apgar score < 7 after 5 minutes %(n) | 1.8 (3)                   | 1.0 (1)                   | 2.9 (2)                           | 0.569   |

LGA: large for gestational age; SGA: small for gestational age; NICU: neonatal intensive care unit;

Statistically significant p-values are in bold.

**Table S3.** Comparison of the correct responses on the knowledge questionnaire prior to the initial education session and after the follow-up session.

|                                                                                                       | prior to the<br>initial session<br>n = 138<br>% (n) | after the<br>follow-up session<br>n = 138<br>% (n) | p-value           |
|-------------------------------------------------------------------------------------------------------|-----------------------------------------------------|----------------------------------------------------|-------------------|
| <b>When is GDM diagnosed?</b>                                                                         |                                                     |                                                    |                   |
| 24 - 28 weeks                                                                                         | 97.1 (134)                                          | 100.0 (138)                                        | 0.125             |
| <b>How is GDM diagnosed?</b>                                                                          |                                                     |                                                    |                   |
| Based on a fasting blood collection in combination with drinking a sugar solution                     | 84.1 (116)                                          | 87.0 (120)                                         | 0.541             |
| <b>It's more likely to develop gestational diabetes if you:</b>                                       |                                                     |                                                    |                   |
| Are overweight before pregnancy                                                                       | 81.9 (113)                                          | 88.4 (122)                                         | 0.064             |
| Gain too much weight during the pregnancy                                                             | 34.8 (48)                                           | 50.7 (70)                                          | <b>0.001</b>      |
| Have had GDM during a previous pregnancy                                                              | 74.6 (103)                                          | 80.4 (11)                                          | 0.115             |
| Have a first degree relative with diabetes                                                            | 77.5 (107)                                          | 84.1 (116)                                         | <b>0.001</b>      |
| Your age is > 30 years                                                                                | 50.0 (69)                                           | 67.4 (93)                                          | <b>&lt;0.0001</b> |
| <b>What are the consequences for the baby if the treatment of GDM is insufficient?</b>                |                                                     |                                                    |                   |
| Too high birth weight of the baby                                                                     | 87.7 (121)                                          | 97.8 (135)                                         | <b>0.0005</b>     |
| Increased risk of diabetes for the baby later on                                                      | 59.4 (82)                                           | 75.4 (104)                                         | <b>0.004</b>      |
| Increased risk of overweight for the baby later on                                                    | 51.4 (71)                                           | 71.7 (99)                                          | <b>&lt;0.0001</b> |
| <b>What are the risks for you if the treatment of GDM is insufficient?</b>                            |                                                     |                                                    |                   |
| An increased risk for a difficult delivery                                                            | 78.7 (107)                                          | 90.4 (123)                                         | <b>0.003</b>      |
| An increased risk for preeclampsia                                                                    | 21.2 (29)                                           | 78.8 (108)                                         | <b>&lt;0.0001</b> |
| An increased risk for a cesarean section                                                              | 69.3 (95)                                           | 92.0 (126)                                         | <b>&lt;0.0001</b> |
| <b>How GDM is initially treated after diagnosis?</b>                                                  |                                                     |                                                    |                   |
| Dietary change and increasing physical activity                                                       | 59.4 (82)                                           | 78.3 (108)                                         | <b>&lt;0.0001</b> |
| Insulin is only started if dietary change and physical activity is insufficient                       | 58.0 (80)                                           | 64.5 (89)                                          | 0.253             |
| <b>Which food products do you have to restrict if you have GDM?</b>                                   |                                                     |                                                    |                   |
| Pie                                                                                                   | 89.9 (124)                                          | 96.4 (133)                                         | <b>0.022</b>      |
| Fruits                                                                                                | 18.8 (26)                                           | 55.8 (77)                                          | <b>&lt;0.0001</b> |
| Sugared soda                                                                                          | 94.9 (131)                                          | 98.6 (136)                                         | 0.063             |
| Fruit juice                                                                                           | 77.5 (107)                                          | 93.5 (129)                                         | <b>&lt;0.0001</b> |
| <b>Which fasting blood sugar level is normal in the morning?</b>                                      |                                                     |                                                    |                   |
| < 95 mg/dl                                                                                            | 42.0 (58)                                           | 97.8 (135)                                         | <b>&lt;0.0001</b> |
| <b>Which blood sugar level is normal 2 hours after eating?</b>                                        |                                                     |                                                    |                   |
| < 120 mg/dl                                                                                           | 26.8 (37)                                           | 96.4 (133)                                         | <b>&lt;0.0001</b> |
| <b>How can best be checked if your blood sugar levels are sufficiently under control?</b>             |                                                     |                                                    |                   |
| Based on a finger prick with a glucometer                                                             | 80.1 (109)                                          | 98.5 (134)                                         | <b>0.0005</b>     |
| <b>What do you think about the treatment with insulin for GDM?</b>                                    |                                                     |                                                    |                   |
| This can lower the risk of an overweight baby                                                         | 47.8 (65)                                           | 71.3 (97)                                          | <b>&lt;0.0001</b> |
| <b>What do you think about breastfeeding after a pregnancy with GDM?</b>                              |                                                     |                                                    |                   |
| This is good for the general health of the baby                                                       | 61.6 (85)                                           | 92.0 (127)                                         | <b>&lt;0.0001</b> |
| This can lower the risk of diabetes and overweight in the baby later on                               | 26.8 (37)                                           | 37.0 (51)                                          | <b>0.018</b>      |
| <b>What do you think that happens with your GDM after your delivery?</b>                              |                                                     |                                                    |                   |
| GDM disappears completely but I have a strongly increased risk of 50% to develop T2DM within 10 years | 44.2 (61)                                           | 82.6 (114)                                         | <b>&lt;0.0001</b> |

GDM: gestational diabetes mellitus; T2DM: type 2 diabetes mellitus; Statistically significant p-values are in bold. .

**Table S4.** Comparison of correct responses on the knowledge questionnaire between group and individual education after the first education session.

|                                                                                                       | group education<br>n = 98<br>% (n) | individual education<br>n = 74<br>% (n) | p-value      |
|-------------------------------------------------------------------------------------------------------|------------------------------------|-----------------------------------------|--------------|
| <b>When is GDM diagnosed?</b>                                                                         |                                    |                                         |              |
| 24 - 28 weeks                                                                                         | 99.0 (97)                          | 98.6 (73)                               | 1.000        |
| <b>How is GDM diagnosed?</b>                                                                          |                                    |                                         |              |
| Based on a fasting blood collection in combination with drinking a sugar solution                     | 87.8 (86)                          | 90.5 (67)                               | 0.740        |
| <b>It's more likely to develop gestational diabetes if you:</b>                                       |                                    |                                         |              |
| Are overweight before pregnancy                                                                       | 91.8 (90)                          | 83.8 (62)                               | 0.164        |
| Gain too much weight during the pregnancy                                                             | 38.8 (38)                          | 36.5 (27)                               | 0.883        |
| Have had GDM during a previous pregnancy                                                              | 77.6 (76)                          | 70.3 (52)                               | 0.364        |
| Have a first degree relative with diabetes                                                            | 89.8 (88)                          | 79.7 (59)                               | 0.102        |
| Your age is > 30 years                                                                                | 62.2 (61)                          | 52.7 (39)                               | 0.271        |
| <b>What are the consequences for the baby if the treatment of GDM is insufficient?</b>                |                                    |                                         |              |
| Too high birth weight of the baby                                                                     | 95.9 (94)                          | 95.9 (71)                               | 1.000        |
| Increased risk of diabetes for the baby later on                                                      | 80.6 (79)                          | 77.0 (57)                               | 0.702        |
| Increased risk of overweight for the baby later on                                                    | 73.5 (72)                          | 75.7 (56)                               | 0.879        |
| <b>What are the risks for you if the treatment of GDM is insufficient?</b>                            |                                    |                                         |              |
| An increased risk for a difficult delivery                                                            | 91.8 (90)                          | 90.5 (67)                               | 0.980        |
| An increased risk for preeclampsia                                                                    | 92.9 (91)                          | 86.5 (64)                               | 0.259        |
| An increased risk for a cesarean section                                                              | 90.8 (89)                          | 91.9 (68)                               | 1.000        |
| <b>How is GDM initially treated after diagnosis?</b>                                                  |                                    |                                         |              |
| Dietary change and increasing physical activity                                                       | 81.6 (80)                          | 77.0 (57)                               | 0.581        |
| Insulin is only started if dietary change and physical activity is insufficient                       | 74.5 (73)                          | 62.2 (46)                               | 0.117        |
| <b>Which food products do you have to restrict if you have GDM?</b>                                   |                                    |                                         |              |
| Pie                                                                                                   | 96.9 (96)                          | 95.9 (71)                               | 1.000        |
| Fruits                                                                                                | 63.6 (62)                          | 55.4 (41)                               | 0.377        |
| Sugared soda                                                                                          | 95.9 (94)                          | 94.6 (70)                               | 0.404        |
| Fruit juice                                                                                           | 98.0 (96)                          | 95.9 (71)                               | 1.000        |
| <b>Which fasting blood sugar level is normal in the morning?</b>                                      |                                    |                                         |              |
| < 95 mg/dl                                                                                            | 98.0 (96)                          | 90.5 (67)                               | <b>0.040</b> |
| <b>Which blood sugar level is normal 2 hours after eating?</b>                                        |                                    |                                         |              |
| < 120 mg/dl                                                                                           | 96.9 (96)                          | 91.9 (68)                               | 0.176        |
| <b>How can best be checked if your blood sugar levels are sufficiently under control?</b>             |                                    |                                         |              |
| Based on a finger prick with a glucometer                                                             | 94.9 (93)                          | 94.6 (70)                               | 1.000        |
| <b>What do you think about the treatment with insulin for GDM?</b>                                    |                                    |                                         |              |
| This can lower the risk of an overweight baby                                                         | 77.6 (76)                          | 71.6 (53)                               | 0.477        |
| <b>What do you think about breastfeeding after a pregnancy with GDM?</b>                              |                                    |                                         |              |
| This is good for the general health of the baby                                                       | 85.7 (84)                          | 95.9 (70)                               | 0.052        |
| This can lower the risk of diabetes and overweight in the baby later on                               | 32.7 (32)                          | 35.6 (26)                               | 0.809        |
| <b>What do you think that happens with your GDM after your delivery?</b>                              |                                    |                                         |              |
| GDM disappears completely but I have a strongly increased risk of 50% to develop T2DM within 10 years | 85.7 (84)                          | 87.8 (65)                               | 0.858        |

GDM: gestational diabetes mellitus; T2DM: type 2 diabetes mellitus; Statistically significant p-values are in bold. .

**Table S5.** Satisfaction rates with the given explanation on 12 items after the initial education session for women in group education compared to women in individual education.

|                                             | strongly disagree |            | disagree   |            | neutral    |            | agree      |            | strongly agree |            | I don't know |            | p-value |
|---------------------------------------------|-------------------|------------|------------|------------|------------|------------|------------|------------|----------------|------------|--------------|------------|---------|
|                                             | G<br>% (n)        | I<br>% (n) | G<br>% (n) | I<br>% (n) | G<br>% (n) | I<br>% (n) | G<br>% (n) | I<br>% (n) | G<br>% (n)     | I<br>% (n) | G<br>% (n)   | I<br>% (n) |         |
| <b>Q1: What is GDM</b>                      | 0.0 (0)           | 1.4 (1)    | 0.0 (0)    | 0.0 (0)    | 2.0 (2)    | 0.0 (0)    | 21.4 (21)  | 14.9 (11)  | 75.5 (74)      | 83.8 (62)  | 1.0 (1)      | 0.0 (0)    | 0.311   |
| <b>Q2: Importance of treatment</b>          | 0.0 (0)           | 1.4 (1)    | 0.0 (0)    | 0.0 (0)    | 3.1 (3)    | 0.0 (0)    | 16.3 (16)  | 12.2 (9)   | 80.6 (79)      | 86.5 (64)  | 0.0 (0)      | 0.0 (0)    | 0.302   |
| <b>Q3: Risks for myself</b>                 | 0.0 (0)           | 1.4 (1)    | 1.0 (1)    | 0.0 (0)    | 4.1 (4)    | 1.4 (1)    | 20.4 (20)  | 12.3 (9)   | 73.5 (72)      | 84.9 (62)  | 1.0 (1)      | 0.0 (0)    | 0.135   |
| <b>Q4: Risks for my baby</b>                | 0.0 (0)           | 1.4 (1)    | 0.0 (0)    | 0.0 (0)    | 2.0 (2)    | 0.0 (0)    | 21.4 (21)  | 13.5 (10)  | 75.5 (74)      | 84.1 (63)  | 1.0 (1)      | 0.0 (0)    | 0.217   |
| <b>Q5: Treatment with diet</b>              | 0.0 (0)           | 1.4 (1)    | 0.0 (0)    | 0.0 (0)    | 4.1 (4)    | 1.4 (1)    | 32.7 (32)  | 20.3 (15)  | 63.3 (62)      | 77.0 (57)  | 0.0 (0)      | 0.0 (0)    | 0.057   |
| <b>Q6: Treatment with physical activity</b> | 0.0 (0)           | 1.4 (1)    | 1.0 (1)    | 0.0 (0)    | 3.1 (3)    | 2.7 (2)    | 28.6 (28)  | 24.3 (18)  | 66.3 (65)      | 71.6 (53)  | 1.0 (1)      | 0.0 (0)    | 0.643   |
| <b>Q7: Weight gain</b>                      | 0.0 (0)           | 2.7 (2)    | 2.0 (2)    | 0.0 (0)    | 12.2 (12)  | 4.1 (3)    | 29.6 (29)  | 34.2 (25)  | 55.1 (54)      | 58.9 (43)  | 1.0 (1)      | 0.0 (0)    | 0.550   |
| <b>Q8: Measuring blood sugar levels</b>     | 0.0 (0)           | 1.4 (1)    | 1.0 (1)    | 0.0 (0)    | 1.0 (1)    | 0.0 (0)    | 17.3 (17)  | 15.3 (11)  | 79.6 (78)      | 83.3 (60)  | 1.0 (1)      | 0.0 (0)    | 0.754   |
| <b>Q9: Treatment with insulin</b>           | 0.0 (0)           | 1.4 (1)    | 3.1 (3)    | 5.6 (4)    | 23.7 (23)  | 12.5 (9)   | 34.0 (33)  | 38.9 (28)  | 37.1 (36)      | 38.9 (28)  | 2.1 (2)      | 2.8 (2)    | 0.539   |
| <b>Q10: Follow-up after delivery</b>        | 0.0 (0)           | 1.4 (1)    | 1.0 (1)    | 0.0 (0)    | 2.0 (2)    | 1.4 (1)    | 31.6 (31)  | 27.0 (20)  | 64.3 (63)      | 70.3 (52)  | 1.0 (1)      | 0.0 (0)    | 0.567   |
| <b>Q11: Risk of diabetes after delivery</b> | 0.0 (0)           | 1.4 (1)    | 1.0 (1)    | 0.0 (0)    | 4.1 (4)    | 0.0 (0)    | 25.5 (25)  | 24.3 (18)  | 68.4 (67)      | 73.0 (54)  | 1.0 (1)      | 1.4 (1)    | 0.403   |
| <b>Q12: Breastfeeding</b>                   | 0.0 (0)           | 2.7 (2)    | 3.1 (3)    | 0.0 (0)    | 3.1 (3)    | 2.7 (2)    | 27.6 (27)  | 21.9 (16)  | 66.3 (65)      | 72.6 (53)  | 0.0 (0)      | 0.0 (0)    | 0.406   |

Q = question; G: group education; I: individual education; GDM: gestational diabetes mellitus; Statistically significant p-values are in bold

**Table S6.** Agreement with the feasibility of the advice for the management of GDM for women in group education compared to women in individual education.

|                                                     | strongly disagree |            | disagree   |            | neutral    |            | agree      |            | strongly agree |            | I don't know |            | p-value |
|-----------------------------------------------------|-------------------|------------|------------|------------|------------|------------|------------|------------|----------------|------------|--------------|------------|---------|
|                                                     | G<br>% (n)        | I<br>% (n) | G<br>% (n) | I<br>% (n) | G<br>% (n) | I<br>% (n) | G<br>% (n) | I<br>% (n) | G<br>% (n)     | I<br>% (n) | G<br>% (n)   | I<br>% (n) |         |
| <b>Advice about diet</b>                            | 0.0 (0)           | 0.0 (0)    | 0.0 (0)    | 1.7 (1)    | 8.5 (6)    | 6.7 (4)    | 36.6 (26)  | 38.3 (23)  | 54.9 (39)      | 53.0 (32)  | 0.0 (0)      | 0.0 (0)    | 0.864   |
| <b>Advice about physical activity</b>               | 0.0 (0)           | 0.0 (0)    | 5.6 (4)    | 8.6 (5)    | 11.1 (8)   | 10.3 (6)   | 43.1 (31)  | 37.9 (22)  | 40.3 (29)      | 43.1 (25)  | 0.0 (0)      | 0.0 (0)    | 0.950   |
| <b>Advice about treatment with insulin*</b>         | 20.0 (1)          | 0.0 (0)    | 0.0 (0)    | 0.0 (0)    | 0.0 (0)    | 20.0 (1)   | 60.0 (3)   | 20.0 (1)   | 0.0 (0)        | 20.0 (1)   | 20.0 (1)     | 40.0 (2)   | 0.421   |
| <b>Advice about weight gain</b>                     | 0.0 (0)           | 0.0 (0)    | 1.4 (1)    | 0.0 (0)    | 5.8 (4)    | 13.6 (8)   | 43.5 (30)  | 39.0 (23)  | 49.3 (34)      | 44.1 (26)  | 0.0 (0)      | 3.4 (2)    | 0.746   |
| <b>Advice about SMBG</b>                            | 0.0 (0)           | 0.0 (0)    | 0.0 (0)    | 0.0 (0)    | 1.4 (1)    | 1.7 (1)    | 36.1 (26)  | 33.9 (20)  | 62.5 (45)      | 64.4 (38)  | 0.0 (0)      | 0.0 (0)    | 0.836   |
| <b>The advice was too strict and I felt starved</b> | 22.5 (16)         | 15.0 (9)   | 38.0 (27)  | 41.7 (25)  | 18.3 (13)  | 20.0 (12)  | 14.1 (10)  | 10.0 (6)   | 5.6 (4)        | 13.3 (8)   | 1.4 (1)      | 0.0 (0)    | 0.377   |
| <b>I am confident in the given advice</b>           | 1.4 (1)           | 0.0 (0)    | 0.0 (0)    | 0.0 (0)    | 4.2 (3)    | 1.7 (1)    | 35.2 (25)  | 36.7 (22)  | 59.2 (42)      | 61.7 (37)  | 0.0 (0)      | 0.0 (0)    | 0.645   |

\* Only those who were treated with insulin and filled in the questionnaire (n = 10); G: group education; I: individual education; GDM: gestational diabetes mellitus; SMBG: self-monitoring of blood glucose; Statistically significant p-values are in bold

**Table S7.** Emotional status before the initial education session versus after the follow-up session for the complete Dutch cohort.

|                                                     | prior to the<br>initial<br>session<br>(n = 128) | After the<br>follow-up<br>session<br>(n = 128) | p-value           |
|-----------------------------------------------------|-------------------------------------------------|------------------------------------------------|-------------------|
| total score on CES-D questionnaire $\geq 16$ , %(n) | 26.6 (34)                                       | 20.3 (26)                                      | 0.186             |
| total STAI-6 score [median (IQR)]                   | 12 (7-17)                                       | 10 (5-15)                                      | <b>&lt;0.0001</b> |

CES-D: Center for Epidemiological Studies Depression; STAI: Spielberger State-Trait Anxiety Inventory;  
Statistically significant p-values are in bold.

**Table S8.** Emotional status in group versus individual education at the end of the initial education session.

|                                                     | general<br>cohort<br>(n = 164) | group<br>education<br>(n = 90) | individual<br>education<br>(n = 74) | p-value |
|-----------------------------------------------------|--------------------------------|--------------------------------|-------------------------------------|---------|
| total score on CES-D questionnaire $\geq 16$ , %(n) | 26.2 (43)                      | 25.6 (23)                      | 27.0 (20)                           | 0.972   |
| total STAI-6 score [median (IQR)]                   | 11 (6-16)                      | 11 (7-15)                      | 11 (6-16)                           | 0.292   |

CES-D: Center for Epidemiological Studies Depression; STAI: Spielberger State-Trait Anxiety Inventory;  
Statistically significant p-values are in bold.
